# Supplementary material
Source: publisher figshare collection journal article supplement (https://frontiersin.figshare.com/ndownloader/files/17515448)
Supplement: Supplementary file [file 17515448]

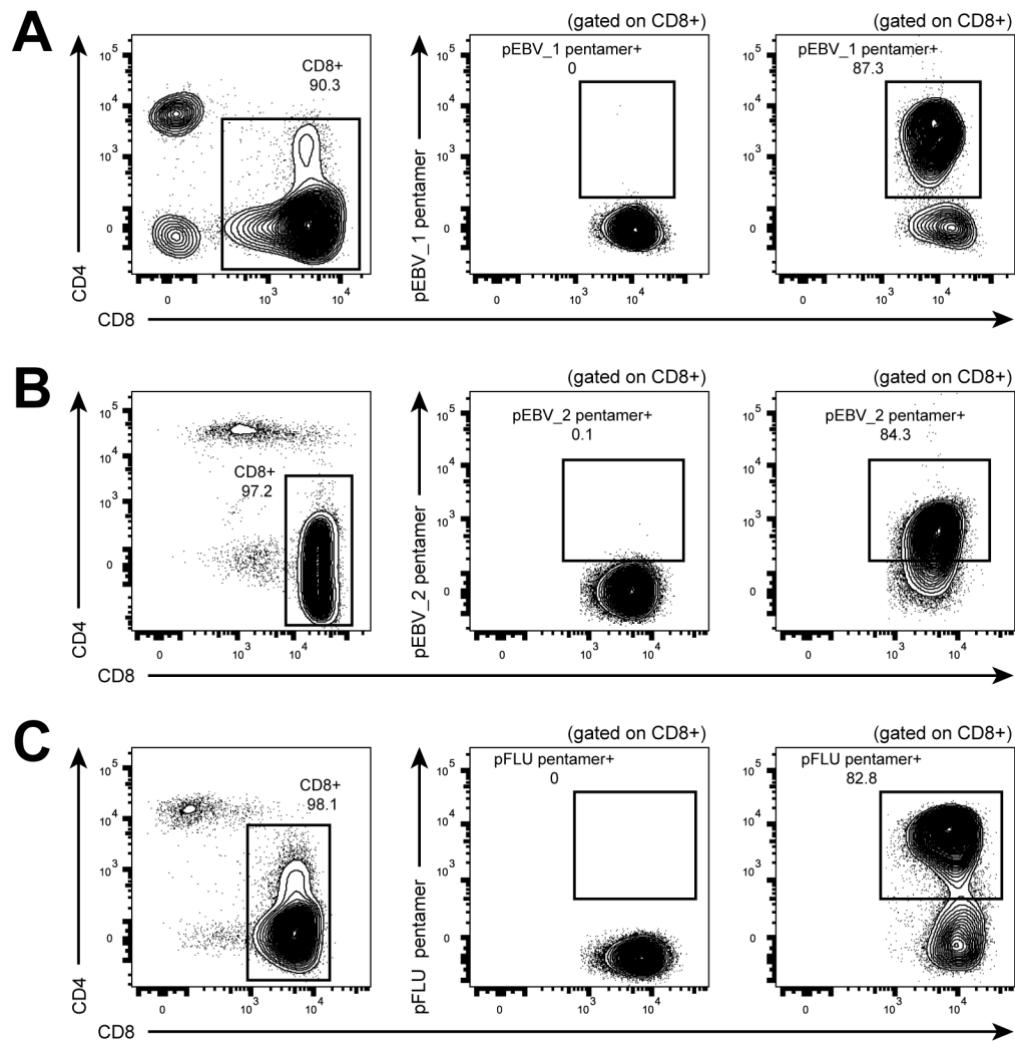

**Supplementary Figure 1 – Peptide-specificity of T cells after *in vitro* expansion.**

Representative flow cytometric analysis of *in vitro* expanded T cells by means of peptide-MHC pentamers after culture with (A) pEBV\_1, (B) pEBV\_2 or (C) pFLU. Cells were gated on single, live, CD3+ and CD8+ (CD4-, left panel). Fluorescence minus one (middle) versus pentamer stained cells (right) are shown.
